# Supplementary material
Source: PubMed Central journal article supplement (PMC10509314)
Supplement: NIHMS1886045-supplement-1.pdf [file NIHMS1886045-supplement-1.pdf]

## Supplementary Tables

### Neural Network Architecture

|                                                        | Optimized Hyperparameters                                                                                                                                                                                                                                                                                                                                                                                                                   |
|--------------------------------------------------------|---------------------------------------------------------------------------------------------------------------------------------------------------------------------------------------------------------------------------------------------------------------------------------------------------------------------------------------------------------------------------------------------------------------------------------------------|
| <b>Neural Network Architecture (PyTorch Lightning)</b> | <ul style="list-style-type: none"><li>• Feature Extractor:<ul style="list-style-type: none"><li>○ ViT (patch_size = 4, dim = 128, depth = 3, heads = 8, mlp_dim = 128)</li><li>○ Output Size = 64</li></ul></li><li>• Linear Classifier:<ul style="list-style-type: none"><li>○ Linear(98, 64) → ReLU → BatchNorm1d → Dropout</li><li>○ Linear(64, 32) → ReLU → BatchNorm1d → Dropout</li><li>○ Linear(32, 1) → Sigmoid</li></ul></li></ul> |
| <b>Model Compilation</b>                               | <ul style="list-style-type: none"><li>• Optimizer: Adam<ul style="list-style-type: none"><li>○ LR = 3e-4</li><li>○ weight_decay = 1e-5</li></ul></li><li>• Loss: Binary Cross Entropy</li></ul>                                                                                                                                                                                                                                             |
| <b>Model Fitting</b>                                   | <ul style="list-style-type: none"><li>• Train / Val / Test (%): 80 / 10 / 10</li><li>• Batch Size = 16</li><li>• Class Weights: 16.13 for Rapid, 1 for Non-Rapid</li></ul>                                                                                                                                                                                                                                                                  |

Table 4. Additional in-depth description of the model architecture.
